# Supplementary material
Source: PubMed Central journal article supplement (PMC539159)

# A. Control Spindle Lengths

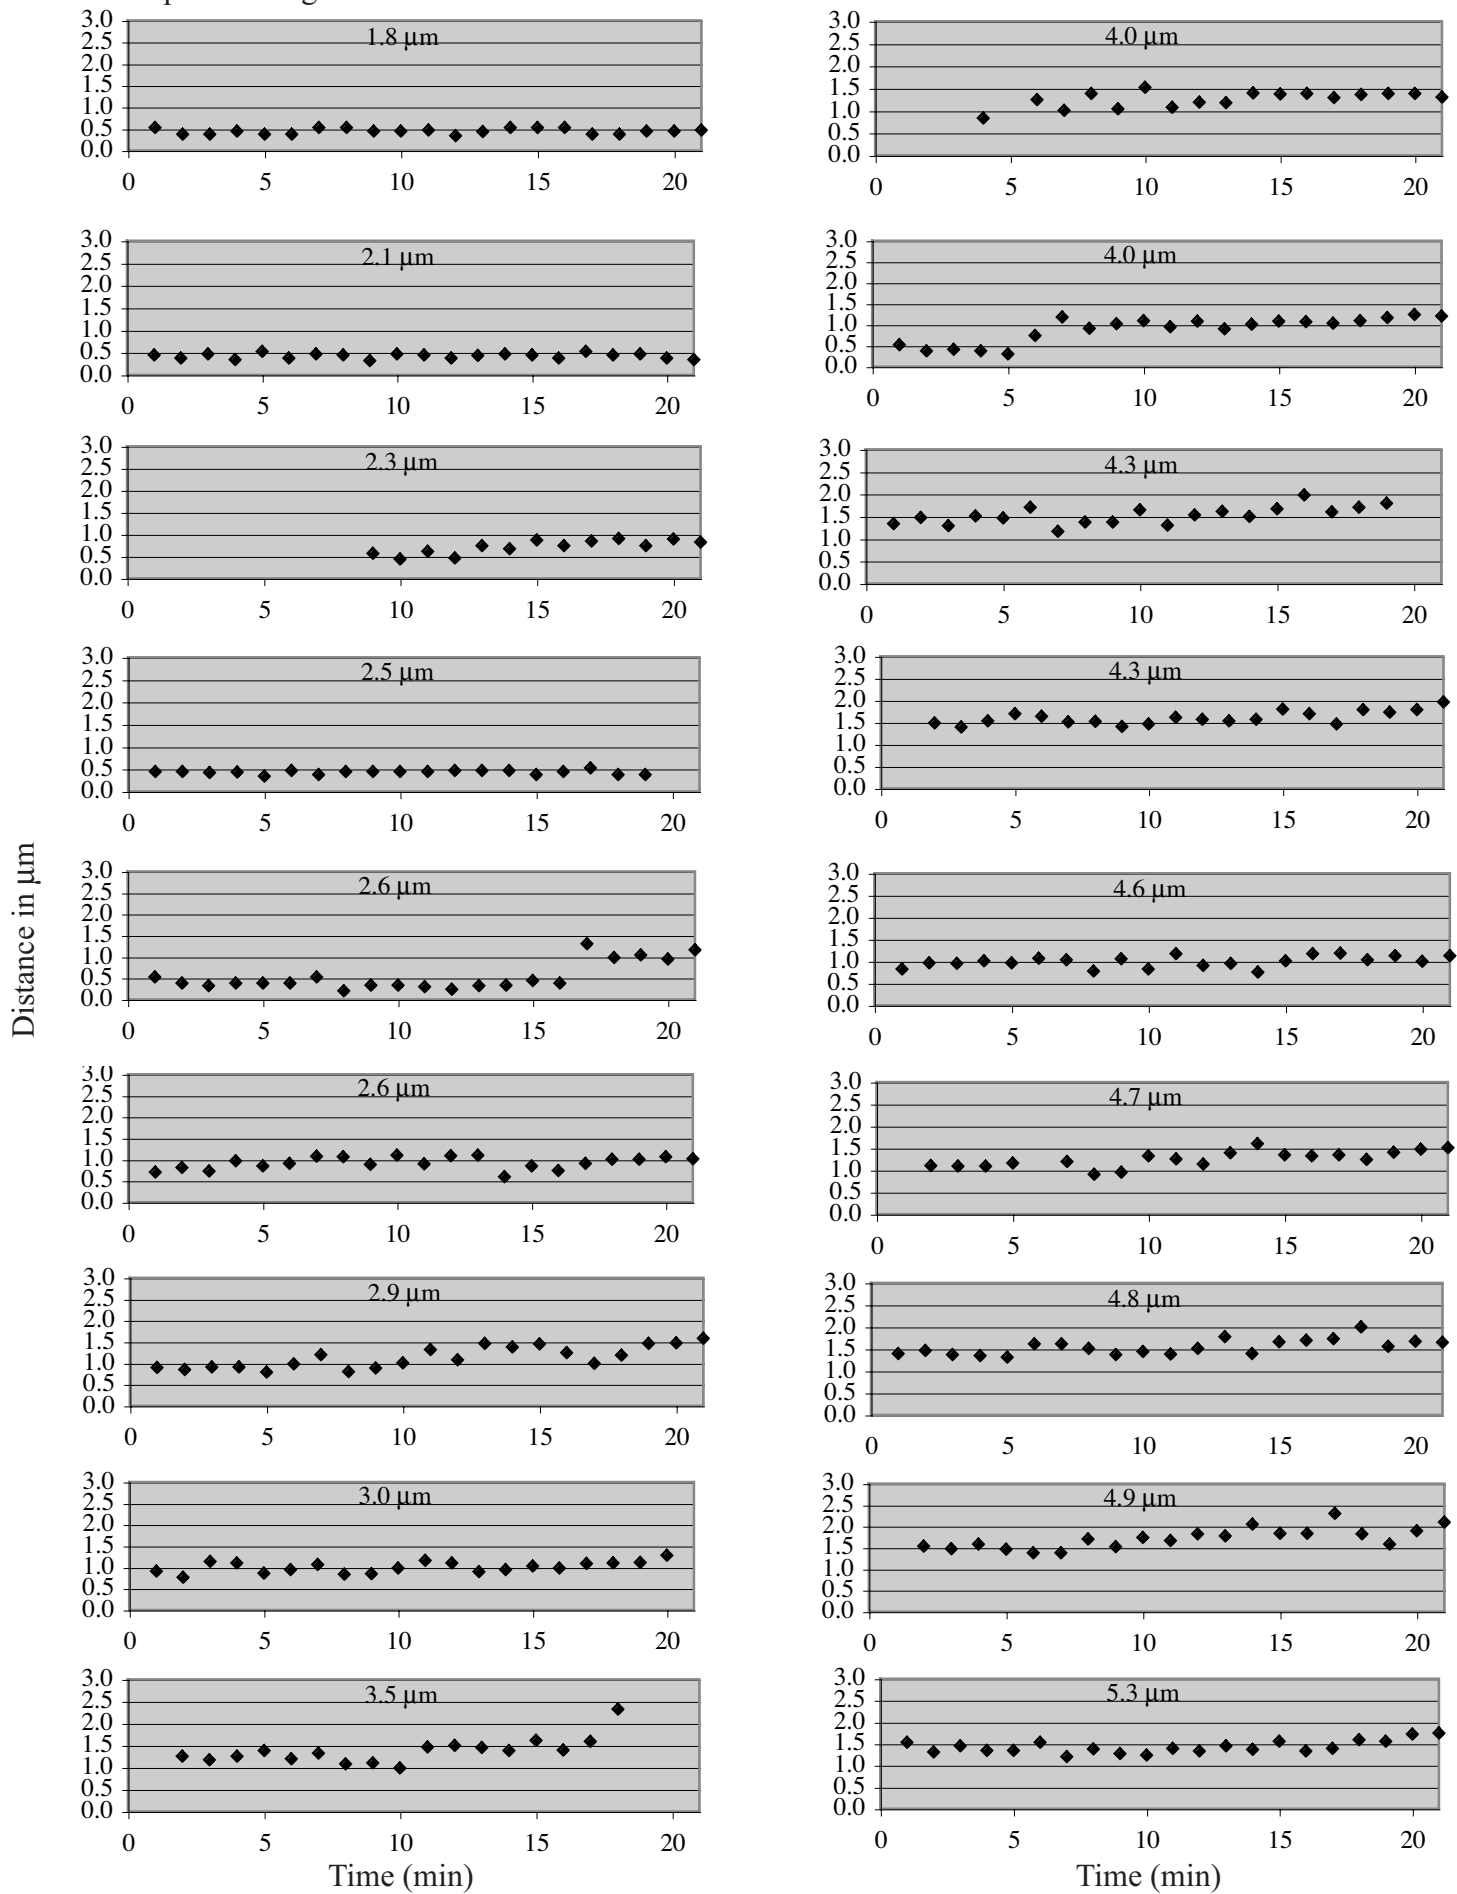



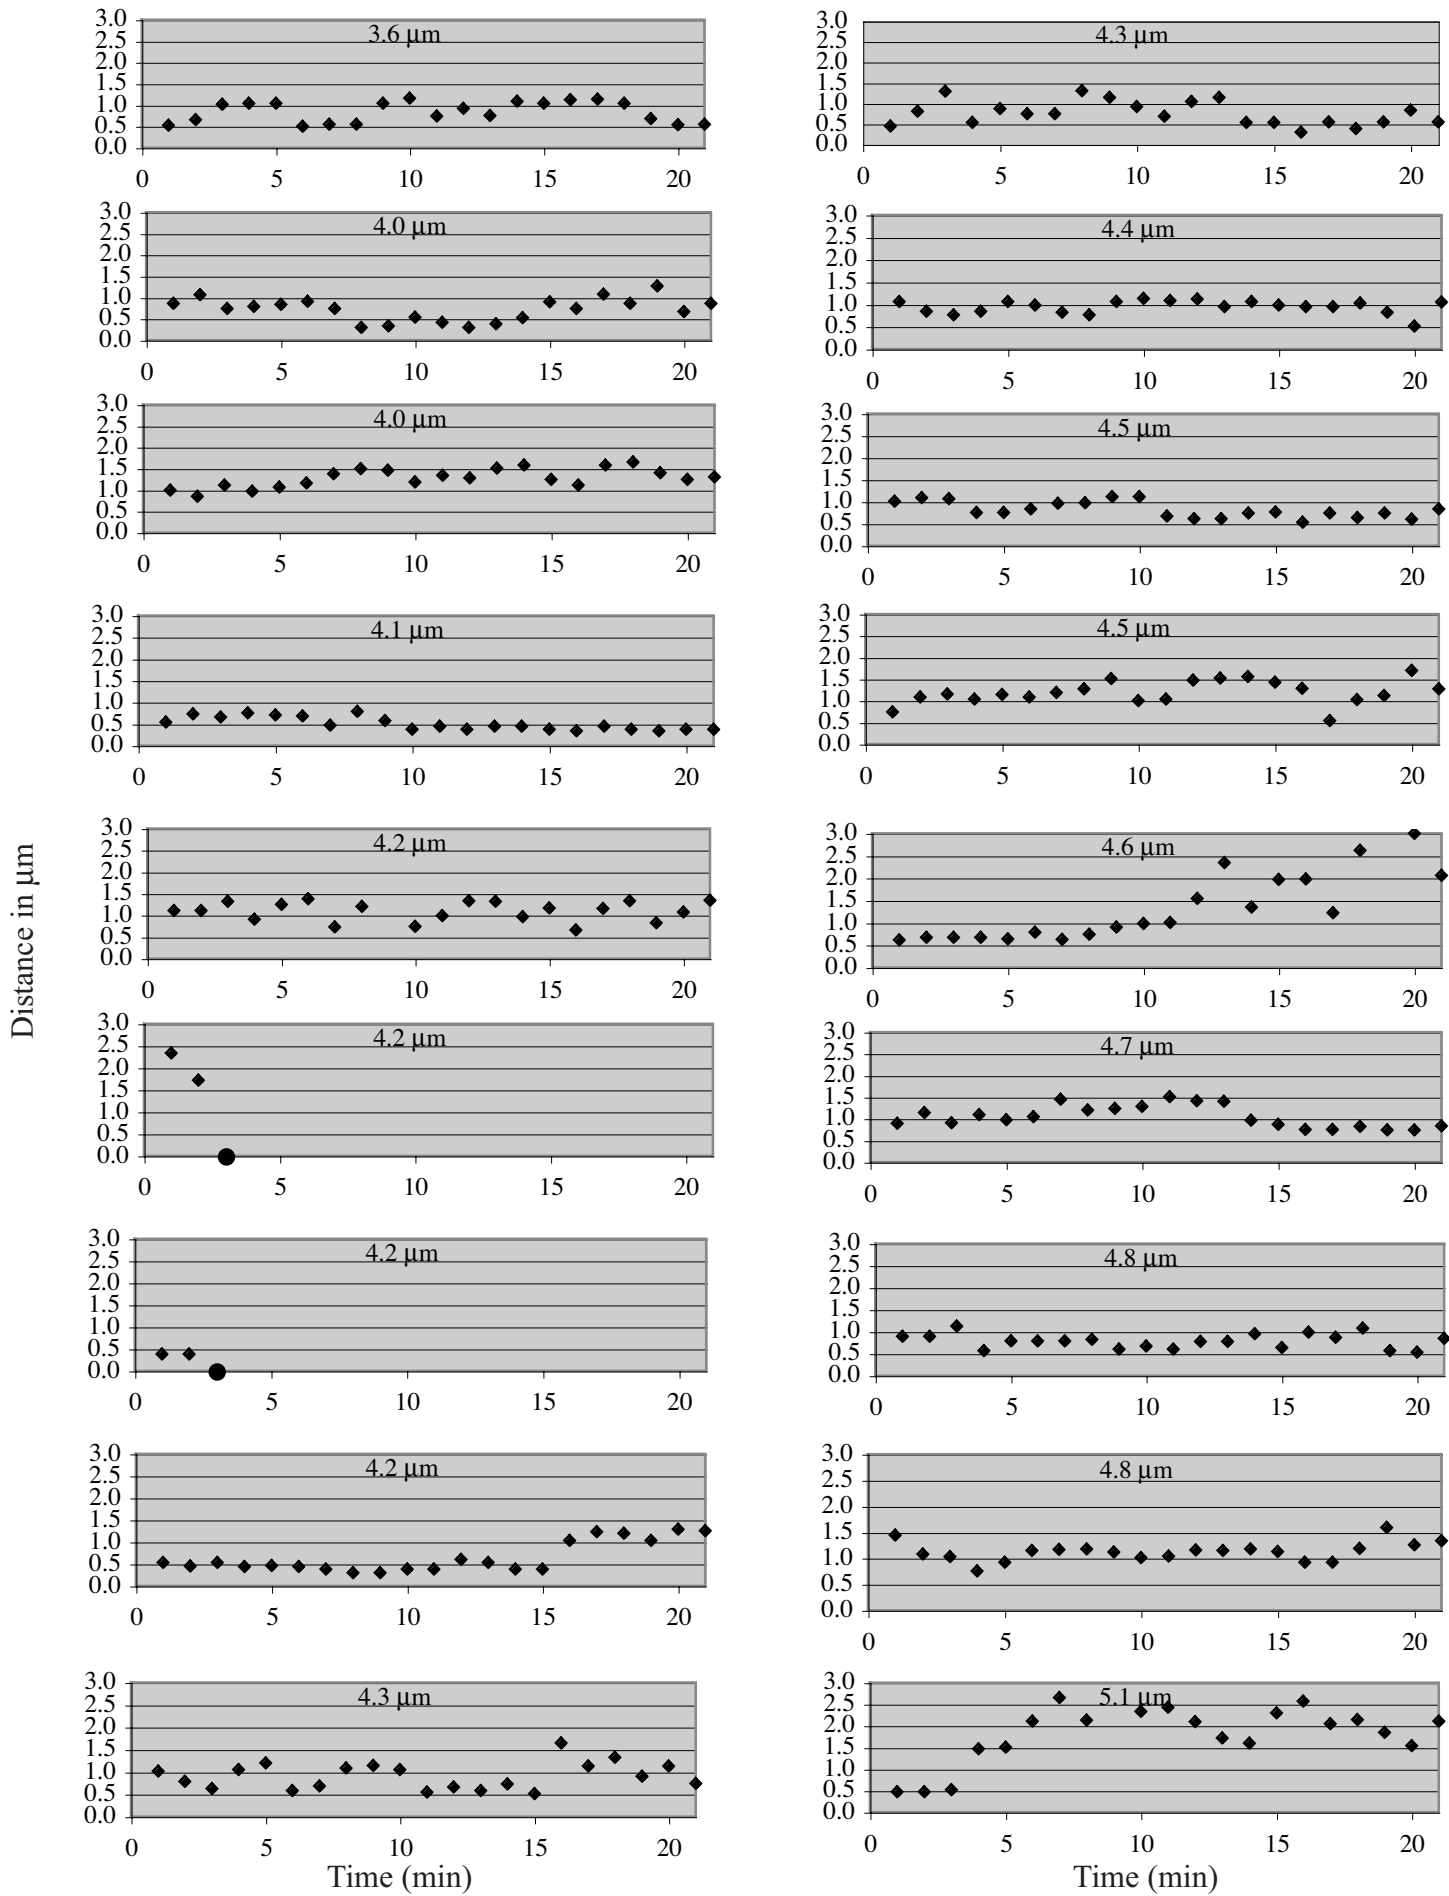

Supplement: mbc_E04-08-0703_1.pdf [file mbc_E04-08-0703_1.pdf]
